# Supplementary material
Source: PubMed Central journal article supplement (PMC2923045)
Supplement: NIHMS225913-supplement-01.pdf [file NIHMS225913-supplement-01.pdf]

## Specific sides to multifaceted glycosaminoglycans are observed in embryonic development

Kenneth L. Kramer

### *Overview of Glycosaminoglycan Biosynthesis*

A short summary of GAG polymerization and modification follows. For more detailed discussion, several excellent reviews should be consulted [1-3].

The longest vertebrate polysaccharide, HA is composed of *N*-acetylglucosamine (GlcNAc) and glucuronic acid (GlcA) repeated to about 10,000 disaccharides (Fig 1). The structure is characterized by a 4-fold helix that is stabilized by weak intramolecular hydrogen bonds, giving HA its well-characterized viscoelastic properties that are critical to its function in eyes and joints [4]. HA synthesis is accomplished by one of three co-polymerases, glycosyltransferases which transfer both monosaccharides to the elongating chain (Supplemental Table). In contrast to the other GAGs, HA is not modified by sulfation, suggesting that it might represent an early evolutionary GAG. However, invertebrates like *Drosophila* or *C. elegans* do not contain homologs of the vertebrate HA co-polymerases.

Galactose (Gal) and GlcNAc are repeated in KS for about 10-50 disaccharide units and are sulfated at the 6-*O* position on both saccharides. KS is not found in invertebrates; a single copy of each polymerizing and modifying enzyme is found in vertebrates. KS can be distinguished from other sulfated GAGs based on its linkages to the core protein, elongation method, and additional modifications. There are two types of KS core protein linkages: KS I (or corneal KS) is found on an *N*-glycan core structure while KS II (or skeletal KS) links via an *O*-glycan core structure, both of which are commonly observed in secreted and membrane-bound glycoproteins. KS polymerization is blocked when one of two closely related sulfotransferases is absent, *Chst2* in brain [5, 6] and *Chst6* in cornea [7], indicating that KS synthesis requires alternating polymerization with 6-*O* sulfation [8]. Finally, the KS chain is not just modified by sulfation, but fucose and sialic acid as well [9].

Invertebrates synthesize CS, but it is not sulfated in *Drosophila* and is undersulfated in *C. elegans* [10]. Addition of *N*-acetylgalactosamine (GalNAc) initiates synthesis of CS on a linker tetrasaccharide that is shared with HS. In vertebrates, CS/DS chain initiation and elongation involves two GalNAc glycosyltransferases and a family of four co-polymerases that each possess GalNAc- and GluA-transferase activity, yet each co-polymerase interacts with another co-polymerase to achieve optimal polymerization [11]. Sulfation at 6-*O* GalNAc occurs in the medial/trans golgi apparatus; epimerizing GlcA to IdoA is dependent on sulfation at the 4-*O*-position and likely takes place later in the golgi [12, 13]. The 2-*O* sulfotransferase prefers 6-*O* and 4-*O* modified CS as substrates, indicating that it is likely the last enzyme in the pathway [14].

HS is the only GAG sulfated in *Drosophila* or *C. elegans* at the same positions as it is in vertebrates [10]. After addition of GlcNAc to the linker tetrasaccharide, GlcA and GlcNAc are polymerized by alternately adding to the nonreducing end by a family of Ext copolymerases. After

elongation or as the chain is elongating, the *Ndst* family of enzymes remove the *N*-acetyl group from selected GlcNAc residues and substitute most of the free amines with sulfates. Subsequent epimerization and sulfation occurs primarily in the *N*-sulfated regions. While *Drosophila* and *C. elegans* only have one gene for each enzymatic step, a similar array of disaccharides is produced [10].

| Gene                                   | Description                                              | Human                                               | Mouse  | Zebrafish | <i>Drosophila</i> | <i>C. Elegans</i> |        |         |
|----------------------------------------|----------------------------------------------------------|-----------------------------------------------------|--------|-----------|-------------------|-------------------|--------|---------|
| <b>HA</b>                              |                                                          |                                                     |        |           |                   |                   |        |         |
| <i>HAS1</i>                            | Polymerizes the alternate addition of GlcA & GlcNAc      | 3036                                                | 15116  | 403130    |                   |                   |        |         |
| <i>HAS2</i>                            |                                                          | 3037                                                | 15117  | 260350    |                   |                   |        |         |
| <i>HAS3</i>                            |                                                          | 3038                                                | 15118  | 282555    |                   |                   |        |         |
| <b>KS</b>                              |                                                          |                                                     |        |           |                   |                   |        |         |
| <i>B4GALT4</i>                         | Adds Gal to KS                                           | 8702                                                | 56375  | 492760    |                   |                   |        |         |
| <i>B3GNT7</i>                          | Adds GlcNAc to KS                                        | 93010                                               | 227327 | 286748    |                   |                   |        |         |
| <i>CHST6</i>                           | Sulfates GlcNAc at the nonreducing end at the C6 hydroxy | 4166                                                | 56773  | 100170782 |                   |                   |        |         |
| <i>CHST2</i>                           |                                                          | 9435                                                | 54371  | 561896    |                   |                   |        |         |
| <i>CHST1</i>                           |                                                          | 8534                                                | 76969  | 445124    |                   |                   |        |         |
| <b>CSIDS</b>                           |                                                          |                                                     |        |           |                   |                   |        |         |
| <b>Chain initiation and elongation</b> |                                                          |                                                     |        |           |                   |                   |        |         |
| <i>CSGALNACT1</i>                      | Adds GalNAc to linkage oligosaccharide                   | 55790                                               | 234356 | 793671    | 36079             |                   |        |         |
| <i>CSGALNACT2</i>                      |                                                          | 55454                                               | 78752  | 560826    |                   |                   |        |         |
| <i>CHSY1</i>                           | Polymerizes the alternate addition of GlcA & GalNAc      | 22856                                               | 269941 | 324407    | 32497             | 172851            |        |         |
| <i>CHSY3</i>                           |                                                          | 337876                                              | 78923  | 368477    |                   |                   |        |         |
| <i>CHPF</i>                            |                                                          | Cooperates with CHSY for chondroitin polymerization | 79586  | 74241     | 794660            | 32259             | 176231 |         |
| <i>CHPF2</i>                           | 54480                                                    |                                                     | 100910 | 100000654 |                   |                   |        |         |
| <b>Chain modification</b>              |                                                          |                                                     |        |           |                   |                   |        |         |
| <i>CHST3</i>                           | Sulfates GalNAc at the C6 hydroxy                        | 9469                                                | 53374  | 556800    |                   |                   |        |         |
|                                        |                                                          |                                                     |        | 559721    |                   |                   |        |         |
| <i>CHST7</i>                           | Sulfates GalNAc at the C6 hydroxy                        | 56548                                               | 60322  | 563748    |                   |                   |        |         |
| <i>CHST15</i>                          | Sulfates GalNAc4S at the C6 hydroxy                      | 51363                                               | 77590  | 565523    |                   |                   |        |         |
| <i>DSE</i>                             | Epimerizes GlcA to IdoA                                  | 29940                                               | 212898 | 568713    |                   |                   |        |         |
| <i>DSEL</i>                            |                                                          | 92126                                               | 319901 | 568099    |                   |                   |        |         |
| <i>CHST14</i>                          | Sulfates GalNAc in DS at the C4 hydroxy                  | 113189                                              | 72136  | 404732    |                   |                   |        |         |
| <i>CHST11</i>                          | Sulfates GalNAc at the C4 hydroxy                        | 50515                                               | 58250  | 404232    | 326156            |                   |        |         |
| <i>CHST12</i>                          |                                                          | 55501                                               | 59031  | 407076    |                   |                   |        |         |
| <i>CHST13</i>                          |                                                          | 166012                                              | 71797  | 565671    |                   |                   |        |         |
| <i>UST</i>                             | Sulfates GlcA at the C2 hydroxy                          | 10090                                               | 338362 | 557218    |                   |                   |        |         |
| <b>HS</b>                              |                                                          |                                                     |        |           |                   |                   |        |         |
| <b>Chain initiation and elongation</b> |                                                          |                                                     |        |           |                   |                   |        |         |
| <i>EXTL3</i>                           | Adds GlcNAc to linkage oligosaccharide                   | 2137                                                | 54616  | 493783    | 37198             | 176502            |        |         |
| <i>EXTL2</i>                           |                                                          | 2135                                                | 58193  | 558373    |                   |                   |        |         |
| <i>EXTL1</i>                           |                                                          | 2134                                                | 56219  |           |                   |                   |        |         |
| <i>EXT1</i>                            | Polymerizes the alternate addition of GlcA & GlcNAc      | 2131                                                | 14042  | 497279    | 36614             | 178080            |        |         |
|                                        |                                                          |                                                     |        | 497280    |                   |                   |        |         |
| <i>EXT2</i>                            |                                                          | 2132                                                | 14043  | 497281    |                   |                   |        |         |
| <i>EXT2</i>                            |                                                          |                                                     |        | 493780    | 3772101           |                   |        |         |
| <b>Chain modification</b>              |                                                          |                                                     |        |           |                   |                   |        |         |
| <i>NDST1</i>                           | Deacetylates and sulfates GlcNAc                         | 3340                                                | 15531  | 62397*    | 38736             | 177675            |        |         |
|                                        |                                                          |                                                     |        | 74936*    |                   |                   |        |         |
| <i>NDST2</i>                           |                                                          |                                                     |        | 8509      |                   |                   | 17423  | 798226  |
| <i>NDST3</i>                           |                                                          | 9348                                                | 83398  | 100317129 |                   |                   |        |         |
| <i>NDST4</i>                           |                                                          | 64579                                               | 64580  |           |                   |                   |        |         |
| <i>GLCE</i>                            | Epimerizes GlcA to IdoA                                  | 26035                                               | 93683  | 405776    | 35569             | 175562            |        |         |
|                                        |                                                          |                                                     |        | 100007670 |                   |                   |        |         |
| <i>HS2ST1</i>                          | Sulfates GlcA and IdoA at the C2 hydroxy                 | 9653                                                | 23908  | 791188    | 44433             | 181309            |        |         |
| <i>HS6ST1</i>                          | Sulfates GlcNAc at the C6 hydroxy                        | 9394                                                | 50785  | 553162    | 42380             | 189586            |        |         |
|                                        |                                                          |                                                     |        | 791107    |                   |                   |        |         |
| <i>HS6ST2</i>                          |                                                          | 90161                                               | 50786  | 378450    |                   |                   |        |         |
| <i>HS6ST3</i>                          |                                                          | 266722                                              | 50787  | 569353    |                   |                   |        |         |
| <i>HS3ST1</i>                          | Sulfates GlcNAc at the C3 hydroxy                        | 9957                                                | 15476  | 792524    |                   |                   |        |         |
| <i>HS3ST2</i>                          |                                                          |                                                     |        | 557111    |                   |                   |        |         |
| <i>HS3ST3</i>                          |                                                          |                                                     |        | 9956      | 195646            | 571246            |        |         |
|                                        |                                                          |                                                     |        | 9953      | 15478             | 558084            | 32918  | 3564879 |
|                                        |                                                          |                                                     |        | 9955      | 54710             | 558084            |        |         |
| <i>HS3ST4</i>                          |                                                          | 9951                                                | 628779 | 563570    |                   |                   |        |         |
| <i>HS3ST5</i>                          |                                                          | 222537                                              | 319415 | 562344    | 37161             | 185573            |        |         |
|                                        |                                                          |                                                     |        | 565201    |                   |                   |        |         |
| <i>HS3ST6</i>                          |                                                          | 64711                                               | 328779 | 100008592 |                   |                   |        |         |

**Supplemental Table: Diversity of GAG biosynthetic enzymes from 4 model organisms compared to humans.** Gene IDs from NCBI's Entrez Gene database were used to consistently identify glycosyltransferases and sulfotransferases as there are numerous inconsistencies between and within online databases. While the enzymatic activity for many gene products has not been fully characterized,

identification is straightforward as the open reading frame covers few exons and significant homologies exist, particularly in the active sites. The vast majority of genes listed here are specific to GAG synthesis, but there are exceptions. For example, the glycosyltransferase B3GAT1 recognizes a wide substrate specificity that includes branched N- and O-glycans [15] while the sulfotransferase CHST3 has been shown to modify GalNAc in CS along with Gal in KS and in the HS-CS linker tetrasaccharide [16].

\* Ensembl gene ID.

### **References** (cited in the supplemental material)

- [1] Prabhakar V, Sasisekharan R. The biosynthesis and catabolism of galactosaminoglycans. *Adv Pharmacol* 2006;53:69-115.
- [2] Esko JD, Selleck SB. ORDER OUT OF CHAOS: Assembly of Ligand Binding Sites in Heparan Sulfate1. *Annual Review of Biochemistry* 2002;71:435-71.
- [3] Laurent TC, Fraser JR. Hyaluronan. *Faseb J* 1992;6:2397-404.
- [4] Almond A, Deangelis PL, Blundell CD. Hyaluronan: the local solution conformation determined by NMR and computer modeling is close to a contracted left-handed 4-fold helix. *J Mol Biol* 2006;358:1256-69.
- [5] Zhang H, Muramatsu T, Murase A, Yuasa S, Uchimura K, Kadomatsu K. N-Acetylglucosamine 6-O-sulfotransferase-1 is required for brain keratan sulfate biosynthesis and glial scar formation after brain injury. *Glycobiology* 2006;16:702-10.
- [6] Ito Z, Sakamoto K, Imagama S, Matsuyama Y, Zhang H, Hirano K, et al. N-Acetylglucosamine 6-O-Sulfotransferase-1-Deficient Mice Show Better Functional Recovery after Spinal Cord Injury. *J Neurosci* 2010;30:5937-47.
- [7] Kitayama K, Hayashida Y, Nishida K, Akama TO. Enzymes responsible for synthesis of corneal keratan sulfate glycosaminoglycans. *J Biol Chem* 2007;282:30085-96.
- [8] Seko A, Yamashita K. Biosynthesis of Keratan Sulfate. *Experimental Glycoscience* 2008. p. 67-9.
- [9] Fosang AJ, Last K, Poon CJ, Plaas AH. Keratan sulphate in the interglobular domain has a microstructure that is distinct from keratan sulphate elsewhere on pig aggrecan. *Matrix Biol* 2009;28:53-61.
- [10] Lawrence R, Olson SK, Steele RE, Wang L, Warrior R, Cummings RD, et al. Evolutionary differences in glycosaminoglycan fine structure detected by quantitative glycan reductive isotope labeling. *J Biol Chem* 2008;283:33674-84.
- [11] Izumikawa T, Koike T, Shiozawa S, Sugahara K, Tamura J-i, Kitagawa H. Identification of Chondroitin Sulfate Glucuronyltransferase as Chondroitin Synthase-3 Involved in Chondroitin Polymerization. *Journal of Biological Chemistry* 2008;283:11396-406.
- [12] Hoppe W, Glossl J, Kresse H. Influence of monensin on biosynthesis, processing and secretion of proteodermatan sulfate by skin fibroblasts. *Eur J Biochem* 1985;152:91-7.
- [13] Pacheco B, Maccarana M, Malmstrom A. Dermatan 4-O-sulfotransferase 1 is pivotal in the formation of iduronic acid blocks in dermatan sulfate. *Glycobiology* 2009;19:1197-203.
- [14] Ohtake S, Kimata K, Habuchi O. Recognition of sulfation pattern of chondroitin sulfate by uronosyl 2-O-sulfotransferase. *J Biol Chem* 2005;280:39115-23.
- [15] Fondeur-Gelinotte M, Lattard V, Gulberti S, Oriol R, Mulliert G, Coughtrie MW, et al. Molecular basis for acceptor substrate specificity of the human beta1,3-glucuronosyltransferases GlcAT-I and GlcAT-P involved in glycosaminoglycan and HNK-1 carbohydrate epitope biosynthesis, respectively. *Glycobiology* 2007;17:857-67.
- [16] Kitagawa H, Tsutsumi K, Ikegami-Kuzuhara A, Nadanaka S, Goto F, Ogawa T, et al. Sulfation of the Galactose Residues in the Glycosaminoglycan-Protein Linkage Region by Recombinant Human Chondroitin 6-O-Sulfotransferase-1. *Journal of Biological Chemistry* 2008;283:27438-43.
